# Supplementary material for: Divergence within the Taxon ‘Candidatus Phytoplasma asteris’ Confirmed by Comparative Genome Analysis of Carrot Strains
Source: MDPI journal article supplement (doi:10.3390/microorganisms12051016), 2024-05-17
Supplement: s1 [file s1]

**Table S1.** Unique CDS of '*Ca. P. asteris*' strains M8 and M33.

| Locus tag    | Product                           |
|--------------|-----------------------------------|
| <b>M8</b>    |                                   |
| QN326_00710  | hypothetical protein              |
| QN326_01000  | hypothetical protein              |
| QN326_01250  | putative secreted protein         |
| QN326_02490  | hypothetical protein              |
| QN326_02740  | hypothetical protein              |
| QN326_03060  | hypothetical protein              |
| QN326_03110  | hypothetical protein              |
| QN326_03170  | hypothetical protein              |
| QN326_03370  | hypothetical protein              |
| QN326_03390  | hypothetical protein              |
| QN326_03550  | hypothetical protein              |
| QN326_04070  | hypothetical protein              |
| QN326_04150  | hypothetical protein              |
| QN326_04390  | hypothetical protein              |
| QN326_04480  | hypothetical protein              |
| QN326_04570  | hypothetical protein              |
| QN326_04590  | hypothetical protein              |
| QN326_04690  | hypothetical protein              |
| QN326_04910  | putative secreted protein         |
| QN326_04990  | hypothetical protein              |
| QN326_05220  | hypothetical protein              |
| QN326_05250  | hypothetical protein              |
| QN326_05410  | hypothetical protein              |
| QN326_05790  | hypothetical protein              |
| QN326_05890  | hypothetical protein              |
| QN326_06420  | putative secreted protein         |
| QN326_06560  | putative secreted protein         |
| QN326_06680  | hypothetical protein              |
| QN326_06710  | hypothetical protein              |
| QN326_06750  | hypothetical protein              |
| QN326_07180  | hypothetical protein              |
| QN326_07200  | putative secreted protein         |
| QN326_07280  | hypothetical protein              |
| QN326_07300  | hypothetical protein              |
| QN326_07370  | hypothetical protein              |
| QN326_07400  | hypothetical protein              |
| QN326_07450  | hypothetical protein              |
| QN326_07490  | hypothetical protein              |
| QN326_07710  | hypothetical protein              |
| QN326_08240  | DEAD/DEAH box helicase            |
| QN326_08580  | hypothetical protein              |
| <b>M33</b>   |                                   |
| M33023_00300 | hypothetical protein              |
| M33023_00330 | hypothetical protein              |
| M33023_00340 | hypothetical protein              |
| M33023_00350 | hypothetical protein              |
| M33023_00360 | hypothetical protein              |
| M33023_00420 | hypothetical protein              |
| M33023_00520 | hypothetical protein              |
| M33023_00910 | hypothetical protein              |
| M33023_01030 | hypothetical protein              |
| M33023_01150 | hypothetical protein              |
| M33023_01230 | hypothetical protein              |
| M33023_01390 | hypothetical protein              |
| M33023_01410 | single-strand DNA-binding protein |
| M33023_01430 | putative secreted protein         |
| M33023_01470 | putative secreted protein         |
| M33023_01680 | hypothetical protein              |
| M33023_01690 | hypothetical protein              |
| M33023_02070 | hypothetical protein              |
| M33023_02300 | hypothetical protein              |

|              |                                     |
|--------------|-------------------------------------|
| M33023_02330 | hypothetical protein                |
| M33023_02350 | hypothetical protein                |
| M33023_02360 | hypothetical protein                |
| M33023_02370 | hypothetical protein                |
| M33023_02450 | hypothetical protein                |
| M33023_02470 | hypothetical protein                |
| M33023_02810 | hypothetical protein                |
| M33023_02840 | hypothetical protein                |
| M33023_03330 | hypothetical protein                |
| M33023_03520 | hypothetical protein                |
| M33023_03840 | hypothetical protein                |
| M33023_03890 | putative secreted protein           |
| M33023_04010 | hypothetical protein                |
| M33023_04050 | putative secreted protein           |
| M33023_04100 | putative secreted protein           |
| M33023_04840 | hypothetical protein                |
| M33023_04960 | hypothetical protein                |
| M33023_04980 | hypothetical protein                |
| M33023_05660 | hypothetical protein                |
| M33023_05800 | hypothetical protein                |
| M33023_05810 | hypothetical protein                |
| M33023_06010 | hypothetical protein                |
| M33023_06270 | hypothetical protein                |
| M33023_06460 | hypothetical protein                |
| M33023_06520 | single stranded DNA binding protein |
| M33023_06600 | hypothetical protein                |
| M33023_06770 | putative secreted protein           |
| M33023_06780 | hypothetical protein                |

\*Unique proteins represent the CDS that were not assigned by Orthofinder.

**Table S2.** Coding of experimentally validated effector proteins within the asteris group.

| Strain       | M33     | AYWB    | M8     | OY-M | M3         | DeVilla | RP166  | Zhengzhou | MDGZ-01  | QS2022  |
|--------------|---------|---------|--------|------|------------|---------|--------|-----------|----------|---------|
| Locus tag    | M33023_ | AYWB_RS | QN326_ | PAM_ | MBSPM3_v1c | EXT02_  | RP166_ | HGD80_RS  | LJP71_RS | QS2022_ |
| <b>Tengu</b> | 02140   | 00785   | 06170  | 765  | 2160       | 01135   | 6200   | 01210     | 02000    | 4580    |
| <b>SAP05</b> | 00370   | 00160   | 00280  | 518  |            |         | 0280   | 03510     |          |         |
| <b>SAP11</b> |         | 01770   | 00690  | 519  | 1080       |         | 0710   |           |          |         |
| <b>SAP54</b> |         | 01055   | 00730  | 049  |            |         | 0750   |           |          | 0730    |

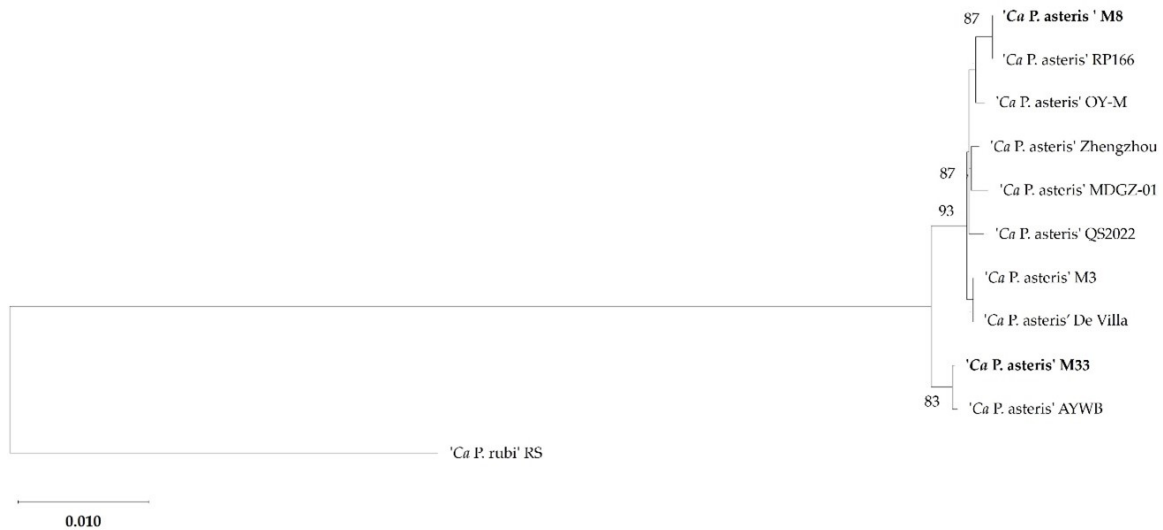

**Figure S1.** Phylogenetic tree of the '*Ca. P. asteris*' strains constructed using the neighbour-joining method, using 16S rDNA sequences of the employing '*Ca. P. rubi*' strain RS as the outgroup. Numbers on the branches are bootstrap values obtained for 1000 replicates (only values above 70 % are shown).

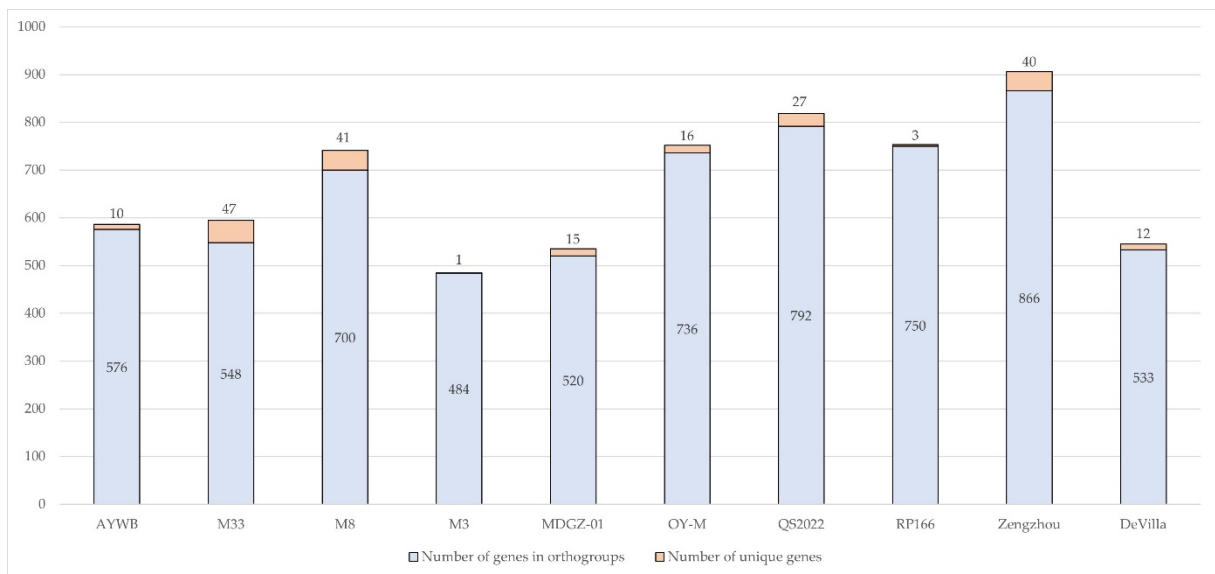

**Figure S2.** Number of shared and unique CDS within the asteris group.
